# Supplementary material for: An indicator framework for the monitoring and evaluation of event-based surveillance systems
Source: PubMed Central journal article supplement — Lancet Glob Health. Author manuscript; Available in PMC 2024 Aug 27. (PMC11348395; doi:10.1016/s2214-109x(24)00034-2), 2024-02-13
Supplement: NIHMS2011590-supplement-Supplementary_appendix.pdf [file NIHMS2011590-supplement-Supplementary_appendix.pdf]

# THE LANCET

## Global Health

### Supplementary appendix

This appendix formed part of the original submission and has been peer reviewed. We post it as supplied by the authors.

Supplement to: Crawley AW, Mercy K, Shivji S, et al. An indicator framework for the monitoring and evaluation of event-based surveillance systems. *Lancet Glob Health* 2024; published online Feb 13. [https://doi.org/10.1016/S2214-109X\(24\)00034-2](https://doi.org/10.1016/S2214-109X(24)00034-2).

# An indicator framework for the monitoring and evaluation of event-based surveillance systems

## Appendix - Table of Contents

|                                                                                                                  |        |
|------------------------------------------------------------------------------------------------------------------|--------|
| Technical Workshop to Revise the Africa CDC Framework for Event-Based Surveillance - Roster of Participants..... | page 2 |
| Event Based Surveillance Monitoring and Evaluation Indicators.....                                               | page 3 |

## Appendix 1: Technical Workshop to Revise the Africa CDC Framework for Event-Based Surveillance - Roster of Participants

6th – 9th July 2022 in Nairobi, Kenya

### Africa CDC:

|                             |                         |          |
|-----------------------------|-------------------------|----------|
| 1. Dativa Aliddeki          | Africa CDC, Eastern RCC | Kenya    |
| 2. Franck Chi Amabo         | Africa CDC, Central RCC | Gabon    |
| 3. Kyeng Mercy              | Africa CDC HQ           | Ethiopia |
| 4. Wari Numbere             | Africa CDC HQ           | Ethiopia |
| 5. John Ojo                 | Africa CDC HQ           | Ethiopia |
| 6. Fatma Osman              | Africa CDC HQ           | Ethiopia |
| 7. Stephanie Salyer         | Africa CDC HQ           | Ethiopia |
| 8. Bethelhem Tibebe Tesfaye | Africa CDC HQ           | Ethiopia |

### Member States:

|                              |                                    |          |
|------------------------------|------------------------------------|----------|
| 9. Herbert Bakiika           | Ministry of Health                 | Uganda   |
| 10. Simwaba Davie            | National Public Health Institute   | Zambia   |
| 11. Mohamed Fawzy            | Ministry of Health and Population  | Egypt    |
| 12. Raymond Hamoonga         | National Public Health Institute   | Zambia   |
| 13. Muntari Hassan           | Nigeria Centre for Disease Control | Nigeria  |
| 14. Shimaa Abu Kamer         | Ministry of Health and Population  | Egypt    |
| 15. Joshua Kayiwa            | Ministry of Health                 | Uganda   |
| 16. Tsepang Lorraine Lekhela | Ministry of Health                 | Lesotho  |
| 17. Ntsoaki Mokete           | Ministry of Health                 | Lesotho  |
| 18. Emmanuel Mwakapasa       | Ministry of Health                 | Tanzania |
| 19. Philip Ngere             | Ministry of Health                 | Kenya    |

### Partners:

|                              |                                                                     |                |
|------------------------------|---------------------------------------------------------------------|----------------|
| 20. Leonidas Alexakis        | European Centres for Disease Control                                | Sweden         |
| 21. Arunmozhi Balajee        | Global Fund                                                         | Switzerland    |
| 22. Adam Crawley             | U.S. CDC                                                            | USA            |
| 23. Andrea Capbianco Dondona | Food and Agricultural Organization                                  | Italy          |
| 24. Comfort Mankga           | Health Information Systems Program                                  | South Africa   |
| 25. Mohamed Mohamed          | ECSA Health Community                                               | Tanzania       |
| 26. Alain Ondzie             | Wildlife Conservation Society                                       | Congo Republic |
| 27. Calvin Sindato           | Southern Africa Center for Infectious Disease Surveillance (SACIDS) | Tanzania       |
| 28. Paolo Tizzani            | World Organisation for Animal Health                                | France         |
| 29. George Sie Williams      | WHO, African Regional Office,                                       | Congo Republic |
| 30. Rahel Yemanaberhan       | Resolve to Save Lives                                               | Ethiopia       |

## Appendix 2: Event Based Surveillance Monitoring and Evaluation Indicators

### Guidance:

The indicators included below are split into a routine monitoring indicator table and an evaluation indicator table. The included indicators are aligned with the indicators found in the updated 2023 version of Africa CDC’s Event-Based Surveillance Framework but may slightly differ in wording and formatting – we have noted where these differences occur in the table.

Countries should begin their M&E process by focusing on the routine collection of data to support monitoring indicators, as these should be achievable measurements for most programs. Evaluation indicators can be incorporated into periodic evaluation efforts aimed at assessing specific components of the EBS system.

The indicators presented should be considered as a baseline for thorough monitoring and evaluation of an EBS system. While the authors consider this set of indicators as ideally the minimum data that are collected, they acknowledge that not every single indicator included below will be applicable or feasible for every EBS program to measure. If this is the case, implementing organizations should begin by monitoring and evaluating as many indicators as possible, with the goal of gradually modifying processes or staffing to accommodate all or most indicators. Since a single set of EBS monitoring and evaluation indicators cannot satisfy all the needs of every program, organizations may also wish to augment this set with additional measurements or adapt the indicators presented to their specific country contexts.

It should be noted that monitoring and evaluation of performance data, as prescribed below, can be complemented by other inputs, such as qualitative data generated from simulation exercises to identify gaps and challenges to be addressed.

### Acronyms:

**C:** community level;

**CHW:** community health worker;

**E:** evaluation;

**EBS:** event-based surveillance;

**EMS:** event management system;

**F:** facility level;

**I:** intermediate level;

**L:** local level;

**M:** routine monitoring;

**Mixed:** mixed, qualitative and quantitative methods;

**N:** national level;

**N/A:** not applicable;

**POE:** point of entry;

**Qual:** qualitative methods;

**Quant:** quantitative methods;

**SOP:** standard operating procedures;

**TWG:** technical working group

| <b>Event Based Surveillance <u>Routine Monitoring</u> Indicators</b> |                                                                                                                    |                                                                                                    |                                 |                                                 |                                               |              |               |
|----------------------------------------------------------------------|--------------------------------------------------------------------------------------------------------------------|----------------------------------------------------------------------------------------------------|---------------------------------|-------------------------------------------------|-----------------------------------------------|--------------|---------------|
| <b>Indicator</b>                                                     | <b>Indicator Description</b>                                                                                       | <b>Numerator</b>                                                                                   | <b>Denominator</b>              | <b>Disaggregates</b>                            | <b>Data Source</b>                            | <b>Freq.</b> | <b>Level</b>  |
| <b>Outcomes</b>                                                      |                                                                                                                    |                                                                                                    |                                 |                                                 |                                               |              |               |
| <b>Timely event detection</b>                                        | Proportion of events detected within 7 days of event start                                                         | Number of events detected within 7 days of event start                                             | Total number of detected events | Geographic area; EBS type                       | EBS reporting tools, EMS, 7-1-7* related data | Quarterly    | N, I, F, L, C |
| <b>Timely event verification</b>                                     | Proportion of events verified within 24 hours after detection                                                      | Number of events verified within 24 hours of detection                                             | Total number of events detected | Geographic area; EBS type                       | EBS reporting tools, EMS                      | Quarterly    | N, I, F       |
| <b>Timely event notification†</b>                                    | Proportion of events which were reported within 24 hours of detection                                              | Number of events reported within 24 hours of detection                                             | Total number of events detected | Geographic area; administrative level; EBS type | EBS reporting tools, EMS, 7-1-7* related data | Quarterly    | N, I, F       |
| <b>Timely event risk assessment</b>                                  | Proportion of verified events for which the first risk assessment was conducted within 24 hours of verification    | Number of events for which the first risk assessment was conducted within 24 hours of verification | Total number of events verified | Geographic area; EBS type                       | EBS reporting tools, EMS                      | Quarterly    | N, I          |
| <b>Timely event notification‡</b>                                    | Proportion of events which were notified (i.e., an alert was issued for action) within 24 hours after verification | Number of events notified within 24 hours of verification                                          | Total number of events verified | Geographic area; EBS type                       | EBS reporting tools, EMS, 7-1-7* related data | Quarterly    | N, I, F       |

| Event Based Surveillance <u>Routine Monitoring</u> Indicators |                                                                                                         |                                                                                                                                            |                                                              |                                                                      |                                                                        |           |               |
|---------------------------------------------------------------|---------------------------------------------------------------------------------------------------------|--------------------------------------------------------------------------------------------------------------------------------------------|--------------------------------------------------------------|----------------------------------------------------------------------|------------------------------------------------------------------------|-----------|---------------|
| Indicator                                                     | Indicator Description                                                                                   | Numerator                                                                                                                                  | Denominator                                                  | Disaggregates                                                        | Data Source                                                            | Freq.     | Level         |
|                                                               |                                                                                                         |                                                                                                                                            |                                                              |                                                                      |                                                                        |           |               |
| <b>Timely initial response†</b>                               | Proportion of events for which all early response actions* were completed within 7 days of notification | Number of events for which all applicable early response actions were completed within 7 days of notification to the responsible authority | Total number of events notified to the responsible authority | Geographic area; EBS type                                            | EBS reporting tools, EMS, data from Response Unit, 7-1-7* related data | Quarterly | N, I          |
| Outputs                                                       |                                                                                                         |                                                                                                                                            |                                                              |                                                                      |                                                                        |           |               |
| <b>Personnel trained to conduct EBS</b>                       | Proportion of personnel trained in EBS                                                                  | Number of EBS staff trained                                                                                                                | Total number of EBS staff                                    | Geographic area; administrative level; cadre of personnel; EBS type  | EBS annual workplan, EBS training reports                              | Quarterly | N, I, F, L, C |
| <b>Signals detected‡</b>                                      | Proportion of signals detected by an EBS source and reported for triage                                 | Number of signals detected and reported for triage by an EBS source                                                                        | Total number of signals detected by EBS sources              | Geographic area; EBS source; cadre of personnel; sector; signal type | EBS reporting tools, EMS                                               | Weekly    | N, I, F, L, C |

| <b>Event Based Surveillance <u>Routine Monitoring</u> Indicators</b> |                                                                                                                   |                                                                             |                                                        |                                                                           |                                                |              |               |
|----------------------------------------------------------------------|-------------------------------------------------------------------------------------------------------------------|-----------------------------------------------------------------------------|--------------------------------------------------------|---------------------------------------------------------------------------|------------------------------------------------|--------------|---------------|
| <b>Indicator</b>                                                     | <b>Indicator Description</b>                                                                                      | <b>Numerator</b>                                                            | <b>Denominator</b>                                     | <b>Disaggregates</b>                                                      | <b>Data Source</b>                             | <b>Freq.</b> | <b>Level</b>  |
| <b>Signals triaged</b>                                               | Proportion of signals triaged                                                                                     | Number of signals triaged                                                   | Number of signals detected and reported for triage     | Geographic area; signal type                                              | EBS reporting tools, EMS                       | Weekly       | N, I, F, L, C |
| <b>Signals which underwent verification†</b>                         | Proportion of triaged signals that underwent verification                                                         | Number of signals verified as events                                        | Number of triaged signals that passed                  | Geographic area; signal type                                              | EBS reporting tools, EMS                       | Weekly       | N, I, F       |
| <b>Signals verified as events</b>                                    | Proportion of signals verified as events                                                                          | Number of signals verified as events                                        | Number of signals that underwent verification          | Geographic area; signal type                                              | EBS reporting tools, EMS                       | Weekly       | N, I, F       |
| <b>Events characterized by risk level</b>                            | Proportion of events that underwent risk assessment                                                               | Number of events assessed for risk                                          | Total number of events                                 | Risk level (low, moderate, high, very high); signal type; geographic area | Risk assessment tool; EBS reporting tools; EMS | Weekly       | N, I          |
| <b>Events responded to‡</b>                                          | Proportion of events responded to, characterized as medium to high-risk level, for which a response was initiated | Number of medium to high-risk events responded to                           | Total number of events assessed as medium to high-risk | Signal type; risk level (low, moderate, high, very high); geographic area | EBS reporting tools, EMS                       | Weekly       | N, I, F, L, C |
| <b>EBS sites reporting on time</b>                                   | Proportion of EBS sites reporting monitoring data within prescribed timeframe                                     | Number of sites reporting monitoring indicators within prescribed timeframe | Total number of EBS sites                              | Geographic area                                                           | EBS reporting tools; EMS                       | Monthly      | N, I, F, L, C |

| Event Based Surveillance <u>Routine Monitoring</u> Indicators |                                                                                                                  |                                                                                                                     |                                                                                              |                                                        |                                                     |           |               |
|---------------------------------------------------------------|------------------------------------------------------------------------------------------------------------------|---------------------------------------------------------------------------------------------------------------------|----------------------------------------------------------------------------------------------|--------------------------------------------------------|-----------------------------------------------------|-----------|---------------|
| Indicator                                                     | Indicator Description                                                                                            | Numerator                                                                                                           | Denominator                                                                                  | Disaggregates                                          | Data Source                                         | Freq.     | Level         |
| <b>EBS site-level data available</b>                          | Proportion of surveillance units within each administrative level routinely reporting EBS data                   | Number of surveillance units per administrative level where EBS data is available to inform surveillance activities | Total number of surveillance units conducting EBS per administrative level                   | Geographic area; administrative level                  | EBS Monitoring Tool; Surveillance Reports/Bulletins | Quarterly | N, I, F, L, C |
| <b>Activities</b>                                             |                                                                                                                  |                                                                                                                     |                                                                                              |                                                        |                                                     |           |               |
| <b>EBS trainings are conducted‡</b>                           | Number of EBS trainings conducted                                                                                | Number of EBS trainings conducted                                                                                   | N/A                                                                                          | Level (national, intermediate, local); cadre; EBS type | EBS annual workplan, EBS training reports           | Quarterly | N, I, F, L, C |
| <b>Multi-sectoral TWG meetings are held‡</b>                  | Proportion of planned multi-sectoral EBS technical working group (TWG) meetings held to guide EBS implementation | Number of multi-sectoral stakeholder technical working group meetings held                                          | Total number of planned technical working group meetings specified by an implementation plan | National level                                         | Program records; TWG Meeting Minutes / Roster       | Quarterly | N             |
| <b>Surveillance units establish EBS within jurisdiction‡</b>  | Proportion of surveillance units (or equivalent) at each administrative level that establish EBS                 | Number of surveillance units that establish EBS                                                                     | Total surveillance units                                                                     | Level (national, intermediate, local)                  | EBS annual workplan                                 | Quarterly | N, I, F, L, C |



| Event Based Surveillance <u>Routine Monitoring</u> Indicators    |                                                                                                         |                                                                     |                                                       |                                       |                                                  |           |               |
|------------------------------------------------------------------|---------------------------------------------------------------------------------------------------------|---------------------------------------------------------------------|-------------------------------------------------------|---------------------------------------|--------------------------------------------------|-----------|---------------|
| Indicator                                                        | Indicator Description                                                                                   | Numerator                                                           | Denominator                                           | Disaggregates                         | Data Source                                      | Freq.     | Level         |
| <b>Facilities establish EBS‡</b>                                 | Proportion of facilities within country that establish EBS                                              | Number of facilities that establish EBS                             | Total facilities                                      | Level (national, intermediate, local) | EBS annual workplan                              | Quarterly | F             |
| <b>Supportive supervision visits are conducted‡</b>              | Proportion of planned supportive supervision visits conducted to EBS sites                              | Number of supportive supervision visits conducted to EBS sites      | Total number of planned supportive supervision visits | Geographic area                       | Program records                                  | Quarterly | N, I, F, L, C |
| Inputs                                                           |                                                                                                         |                                                                     |                                                       |                                       |                                                  |           |               |
| <b>Establishment of a Multisectoral TWG</b>                      | EBS Multisectoral Technical Working Group established at the national level to guide EBS implementation | EBS multi-sectoral TWG established at the national level            | N/A                                                   | National level                        | EBS workplan, EBS TWG meeting minutes and roster | Once      | N             |
| <b>Equipment and reporting tools are procured and available‡</b> | Number of sites implementing EBS that received equipment and reporting tools                            | Number of sites implementing EBS with equipment and reporting tools | Total number of sites implementing EBS                | Geographic area                       | EBS annual workplan, EBS budget                  | Yearly    | N, I, F, L, C |
| <b>EBS priority events are determined</b>                        | Priority events to be included in EBS are identified and signal definitions drafted                     | Priority EBS events identified and signal definitions drafted       | N/A                                                   | National level                        | EBS annual workplan                              | Yearly    | N             |

| Event Based Surveillance <u>Routine Monitoring</u> Indicators                |                                                                                                        |                                                                                                        |             |                                   |             |        |               |
|------------------------------------------------------------------------------|--------------------------------------------------------------------------------------------------------|--------------------------------------------------------------------------------------------------------|-------------|-----------------------------------|-------------|--------|---------------|
| Indicator                                                                    | Indicator Description                                                                                  | Numerator                                                                                              | Denominator | Disaggregates                     | Data Source | Freq.  | Level         |
| <b>EBS staff and key stakeholders available to implement EBS activities‡</b> | Number of EBS-related staff available to implement EBS                                                 | Number of staff and key stakeholders available to implement EBS                                        | N/A         | EBS setting; administrative level |             | Yearly | N, I, F, L, C |
| <b>EMS established</b>                                                       | Electronic event management system that captures, analyses, and reports event-related data is in place | Electronic event management system that captures, analyses, and reports event-related data is in place | N/A         |                                   | EMS         | Yearly | N, I, F       |

\* 717 recommends tracking the dates associated with the start of an event, event detection, first notification or reporting of an event to a health authority, and early response efforts. Specific 717 indicators and definitions are listed here: <https://717alliance.org/digital-toolkit/#0>

† Indicator introduced to help better align with 7-1-7 recommendations and inform the timeliness associated with the initial stages of EBS reporting within before a risk assessment and alert/notification is issued for action.

‡ Indicator has been slightly modified from the Africa CDC Framework to improve clarity.

| <b>Event Based Surveillance <u>Evaluation</u> Indicators</b> |                                                                                                                                                                        |                                                                                                         |                                                                      |                |                                                       |              |
|--------------------------------------------------------------|------------------------------------------------------------------------------------------------------------------------------------------------------------------------|---------------------------------------------------------------------------------------------------------|----------------------------------------------------------------------|----------------|-------------------------------------------------------|--------------|
| <b>Indicator</b>                                             | <b>Indicator Description</b>                                                                                                                                           | <b>Numerator</b>                                                                                        | <b>Denominator</b>                                                   | <b>Methods</b> | <b>Data Source</b>                                    | <b>Level</b> |
| <b>Impact</b>                                                |                                                                                                                                                                        |                                                                                                         |                                                                      |                |                                                       |              |
| <b>Reduced mortality</b>                                     | Mortality rate in a specified population for a priority event under surveillance is reduced compared to the previous year(s)                                           | Deaths in specified population for priority event                                                       | Number of persons in specified population                            | Quantitative   | EBS reporting tools, EMS, all-cause mortality reports | N            |
| <b>Reduced morbidity</b>                                     | Morbidity rate in a specified population for a priority event under surveillance is reduced compared to previous year(s)                                               | Persons in specified population with morbidity due to priority event                                    | Number of persons in specified population                            | Quantitative   | EBS reporting tools, EMS                              | N            |
| <b>Reduced spill-over</b>                                    | Proportion of zoonotic events (initially detected in the animal population) that spilled over into, or led to human cases is reduced in comparison to previous year(s) | Number of zoonotic events detected in the animal population that spilled over into the human population | Total number of zoonotic events detected in the animal population    | Quantitative   | EBS reporting tools, EMS                              | N            |
| <b>Reduced spread of events</b>                              | Proportion of events that impacted more than 1 district is reduced compared to previous year(s)                                                                        | Number of events that spread to >1 district                                                             | Number of all events reported                                        | Quantitative   | EBS reporting tools, EMS                              | N, I         |
| <b>Reduced event response costs</b>                          | Amount that event response costs are reduced compared to previous year(s)                                                                                              | Event response costs                                                                                    | N/A                                                                  | Mixed          | EMS, budgetary reports, costing analysis              | N            |
| <b>Cost-effectiveness of EBS</b>                             | Cost effectiveness of outbreak detection and response using event-based surveillance                                                                                   | Cost of investments in the event-based                                                                  | Costs of outbreak detection and response activities for events under | Quantitative   | Cost-effectiveness analysis                           | N            |

|                                                                |                                                                                                                                                                                                                                                                                                                                                                                                                                                                                                                                                                                                                                                                                       |                                                                                   |                                                                         |              |                                                                              |               |
|----------------------------------------------------------------|---------------------------------------------------------------------------------------------------------------------------------------------------------------------------------------------------------------------------------------------------------------------------------------------------------------------------------------------------------------------------------------------------------------------------------------------------------------------------------------------------------------------------------------------------------------------------------------------------------------------------------------------------------------------------------------|-----------------------------------------------------------------------------------|-------------------------------------------------------------------------|--------------|------------------------------------------------------------------------------|---------------|
|                                                                |                                                                                                                                                                                                                                                                                                                                                                                                                                                                                                                                                                                                                                                                                       | surveillance system                                                               | surveillance in jurisdictions not implementing event-based surveillance |              |                                                                              |               |
| <b>Increased country support for EBS</b>                       | Proportion of funding from the government for EBS programme has increased, due to improved EWAR, compared to prior year(s)                                                                                                                                                                                                                                                                                                                                                                                                                                                                                                                                                            | Funding allocated to EBS from government                                          | Total EBS budget                                                        | Quantitative | EMS, budgetary reports, EBS annual workplan                                  | N             |
| <b>Outcomes</b>                                                |                                                                                                                                                                                                                                                                                                                                                                                                                                                                                                                                                                                                                                                                                       |                                                                                   |                                                                         |              |                                                                              |               |
| <b>Usefulness and quality of EBS data for decision-making*</b> | <p>Proportion of decision-makers who responded with an average score <math>\geq 4</math> across four key criteria on Likert scale rating from EBS staff and key decision-makers on four key criteria:</p> <p>(1) how useful are EBS data for outbreak detection and response (1=not at all useful; 5=very useful);</p> <p>(2) whether EBS system in their site/jurisdiction is sensitive enough (1=not at all sensitive, 5=very sensitive);</p> <p>(3) whether EBS system in their site/jurisdiction is specific enough (1=not at all sensitive, 5=very sensitive);</p> <p>(4) how well EBS data are trusted and considered accurate (1=not at all trusted, 5=very well trusted).</p> | Number of decision-makers whose scores across four key criteria averaged $\geq 4$ | Total number of decision makers surveyed                                | Mixed        | Questionnaires, interviews, focus groups                                     | N, I, F, L, C |
| <b>Sensitivity</b>                                             | Proportion of high-risk health events that were detected through EBS out of all health events that                                                                                                                                                                                                                                                                                                                                                                                                                                                                                                                                                                                    | Number of high-risk health events detected through the EBS system                 | Total number of unique high-risk events reported                        | Quantitative | EBS and IBS reporting tools and databases, EMS, other surveillance databases | N             |

|                                        |                                                                                                                                                                                                                                                                                                                                                                                                                                                                                                                                                                                                                                                                                                       |                                                                                                                 |                                                                        |              |                                                                                                                    |               |
|----------------------------------------|-------------------------------------------------------------------------------------------------------------------------------------------------------------------------------------------------------------------------------------------------------------------------------------------------------------------------------------------------------------------------------------------------------------------------------------------------------------------------------------------------------------------------------------------------------------------------------------------------------------------------------------------------------------------------------------------------------|-----------------------------------------------------------------------------------------------------------------|------------------------------------------------------------------------|--------------|--------------------------------------------------------------------------------------------------------------------|---------------|
|                                        | were detected by any means over the past year                                                                                                                                                                                                                                                                                                                                                                                                                                                                                                                                                                                                                                                         |                                                                                                                 | through both IBS and EBS                                               |              |                                                                                                                    |               |
| <b>Positive predictive value (PPV)</b> | Probability that a signal detected corresponds to a genuine health risk (verified event)                                                                                                                                                                                                                                                                                                                                                                                                                                                                                                                                                                                                              | Total number of events                                                                                          | Total number of signals                                                | Quantitative | EBS reporting tools, EMS                                                                                           | N             |
| <b>EBS system utility*</b>             | <p>Proportion of community leaders and government stakeholders who responded with an average score <math>\geq 4</math> across four key criteria on Likert scale rating from EBS staff and key decision-makers on four key criteria:</p> <p>(1) how useful is the EBS system for outbreak detection and response (1=not at all useful; 5=very useful);</p> <p>(2) whether EBS system in their site/jurisdiction is sensitive enough (1=not at all sensitive, 5=very sensitive);</p> <p>(3) whether EBS system in their site/jurisdiction is specific enough (1=not at all sensitive, 5=very sensitive);</p> <p>(4) how well the EBS system is trusted (1=not at all trusted, 5=very well trusted).</p> | Number of community leaders and government stakeholders whose scores across four key criteria averaged $\geq 4$ | Total number of community leaders and government stakeholders surveyed | Mixed        | Questionnaires; semi structured interviews including focus groups with all staff and supervisor/mentor interviews. | N, I, C       |
| <b>EBS workforce motivation</b>        | Proportion of EBS workforce with improved motivation to implement EBS functions                                                                                                                                                                                                                                                                                                                                                                                                                                                                                                                                                                                                                       | Number of EBS workforce with improved motivation to                                                             | Total number of EBS workforce surveyed                                 | Mixed        | Questionnaires; semi structured interviews including focus groups with all staff and                               | N, I, F, L, C |

|                                                  |                                                                                                                                                                     |                                                                                         |                                        |       |                                                                                                            |               |
|--------------------------------------------------|---------------------------------------------------------------------------------------------------------------------------------------------------------------------|-----------------------------------------------------------------------------------------|----------------------------------------|-------|------------------------------------------------------------------------------------------------------------|---------------|
|                                                  | Likert scale rating from surveillance workforce surveyed on self-assessed motivation levels, and self-assessed competency in implementing EBS functions             | implement EBS functions                                                                 |                                        |       | supervisor/mentor interviews                                                                               |               |
| <b>EBS workforce competency</b>                  | Proportion of surveillance staff with improved competency in analysis and interpretation of EBS data for early warning surveillance                                 | Number of EBS staff with improved competency in analysis and interpretation of EBS data | Total number of EBS workforce assessed | Mixed | Questionnaires; semi structured interviews; focus groups with all staff; and supervisor/mentor interviews. | N, I, F, L    |
| <b>EBS workforce capacity</b>                    | Proportion of trained EBS staff actively engaged in EBS activities                                                                                                  | Number of trained EBS staff actively engaged in EBS activities                          | Total number of trained EBS staff      | Mixed |                                                                                                            | N, I, F, L, C |
| <b>EBS workforce improved knowledge</b>          | Proportion of EBS staff with improved knowledge and skills in EBS from pre to post test                                                                             | Number of EBS staff with improved knowledge and skills from pre to post test            | Total number of trained EBS staff      | Mixed | Pre and post test                                                                                          | N, I, F, L, C |
| <b>Outputs</b>                                   |                                                                                                                                                                     |                                                                                         |                                        |       |                                                                                                            |               |
| <b>Personnel equipped to conduct EBS</b>         | Proportion of personnel with the appropriate materials/resources at each level                                                                                      | Number of EBS staff equipped                                                            | Total number of EBS staff              | Mixed | Program records; EBS training reports                                                                      | N, I, F, L, C |
| <b>Activities</b>                                |                                                                                                                                                                     |                                                                                         |                                        |       |                                                                                                            |               |
| <b>EBS evaluation site visits are conducted*</b> | Proportion of sites implementing EBS where evaluation site visits are conducted (including data review, focus groups, and key informant interviews, as appropriate) | Number of sites implementing EBS evaluated                                              | Total sites implementing EBS           | Mixed | EBS annual workplan, EBS evaluation report                                                                 | N, I, F, L, C |

|                                                                             |                                                                                                                                       |                                                                                             |                                        |       |                                                                       |               |
|-----------------------------------------------------------------------------|---------------------------------------------------------------------------------------------------------------------------------------|---------------------------------------------------------------------------------------------|----------------------------------------|-------|-----------------------------------------------------------------------|---------------|
| <b>EBS signals are updated periodically*</b>                                | Frequency that EBS signals are reviewed and/or updated                                                                                | Number of times per year that EBS signals are reviewed and/or updated at the national level | N/A                                    | Mixed | Program records                                                       | N             |
| <b>EBS reporting units are using digital systems*</b>                       | Proportion of reporting units using digital systems for EBS                                                                           | Number of sites utilizing digital systems for EBS                                           | Total sites implementing EBS           |       | Program records                                                       |               |
| <b>Inputs</b>                                                               |                                                                                                                                       |                                                                                             |                                        |       |                                                                       |               |
| <b>Existence of EBS signals for all sources/sites</b>                       | EBS signals are defined for detection of priority events at all levels and in all settings                                            | N/A                                                                                         | N/A                                    | Mixed | EBS evaluation report                                                 | N, I, F, L, C |
| <b>EBS implementation sites and sources identified</b>                      | Administrative levels and EBS types identified for EBS implementation                                                                 | N/A                                                                                         | N/A                                    | Mixed | EBS annual workplan, EBS evaluation reports, EBS reporting tools, EMS | N, I, F, L, C |
| <b>EBS technical guidelines and SOPs are approved and available for use</b> | Proportion of sites (by EBS type and administration level) implementing EBS that have the EBS technical guidelines and SOPs available | Number of sites implementing EBS with guidelines and SOPs                                   | Total number of sites implementing EBS | Mixed | Guidelines, SOPs, EBS evaluation reports                              | N, I, F, L, C |
| <b>National EBS focal point established</b>                                 | National EBS focal point established                                                                                                  | N/A                                                                                         | N/A                                    | Mixed | Program records                                                       | N             |
| <b>EBS implementation workplan is available*</b>                            | National EBS implementation workplan developed and available                                                                          | N/A                                                                                         | N/A                                    | Mixed | Program records                                                       | N             |
| <b>EBS training materials are available*</b>                                | EBS training modules and training materials developed, approved and available for use                                                 | N/A                                                                                         | N/A                                    | Mixed | EBS Training Materials; Program records                               | N             |

|                                         |                                                                             |     |     |       |                 |   |
|-----------------------------------------|-----------------------------------------------------------------------------|-----|-----|-------|-----------------|---|
| <b>EBS M&amp;E tools are available*</b> | EBS monitoring and evaluation tools are developed and available for use     | N/A | N/A | Mixed | Program records | N |
| <b>EBS M&amp;E plan is available*</b>   | Availability of an M&E plan agreed to by stakeholders and regularly updated | N/A | N/A | Mixed | Program records | N |
| <b>Amount of EBS budget available</b>   | Amount of budget allocated to EBS implementation                            | N/A | N/A | Quant | Type            | N |

\* Indicator has been slightly modified from the Africa CDC Framework to improve clarity
